# Supplementary material for: Biogenic synthesis of copper oxide nanoparticles: comprehensive in vitro profiling for cervical cancer treatment and antibacterial strategies
Source: Royal Society of Chemistry journal article supplement (doi:10.1039/d4nj01194e), 2024-01-01
Supplement: d4nj01194e1.pdf [file d4nj01194e1.pdf]

## Biogenic Synthesis of Copper Oxide Nanoparticles: A Comprehensive In Vitro Profiling for Cervical Cancer Treatment and Antibacterial Strategies

Gouranga Dutta<sup>1</sup>, Dipanjan Ghosh<sup>2</sup>, Krithiga Venkatesan<sup>1</sup>, Gopal Chakrabarti<sup>2</sup>, Abimanyu Sugumaran<sup>3\*</sup>,  
Damodharan Narayanasamy<sup>1\*</sup>

<sup>1</sup>Department of Pharmaceutics, SRM College of Pharmacy, SRM Institute of Science and Technology, Kattankulathur, Tamilnadu 603203, India

<sup>2</sup>Department of Biotechnology and Dr. B. C. Guha Centre for Genetic Engineering and Biotechnology, University of Calcutta, Kolkata 700019, India.

<sup>3</sup>Department of Pharmaceutical Sciences, Sushruta School of Medical and Paramedical Sciences, Assam University, Silchar, Assam 788011, India

### Correspondence:

Dr. Abimanyu Sugumaran, Email: [abipharmastar@gmail.com](mailto:abipharmastar@gmail.com)

Dr. Damodharan Narayanaswamy, Email: [damodhan@srmist.edu.in](mailto:damodhan@srmist.edu.in)

| a. FLAVONOID<br>(Lead acetate test)                                               | b. GLYCOSIDE<br>(Killer Killani test)                                             | c. TANNIN<br>(Gelatin test)                                                       | d. PHENOL<br>(Ferric chloride test)                                               | e. STERIOD<br>(Salkowski's test)                                                   | f. PROTEIN<br>(Ninhydrin test)                                                      | g. SAPONIN<br>(Forth test)                                                          |
|-----------------------------------------------------------------------------------|-----------------------------------------------------------------------------------|-----------------------------------------------------------------------------------|-----------------------------------------------------------------------------------|------------------------------------------------------------------------------------|-------------------------------------------------------------------------------------|-------------------------------------------------------------------------------------|
|  |  |  |  |  |  |  |
| Yellow color precipitate (+)                                                      | Brown ring formation (+)                                                          | White buff precipitate (+)                                                        | Greenish black color (+)                                                          | Reddish brown color (+)                                                            | Violet color (+)                                                                    | Foam formation (+)                                                                  |

**SupplementaryFigure S1:** Presence of phytochemicals in *Erythrina variegata* leaf extract

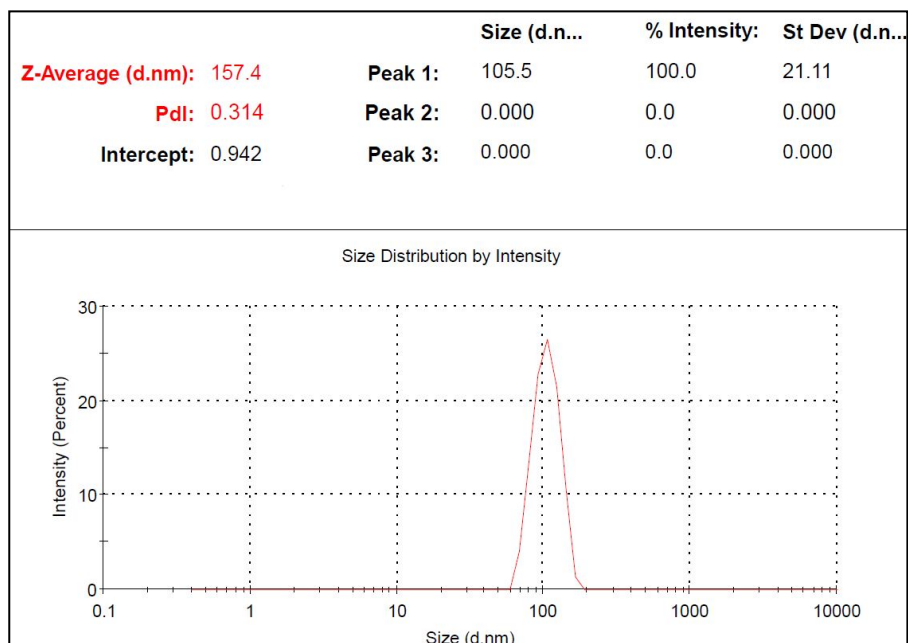

**SupplementaryFigure S2:** The hydrodynamic size of the synthesized CuO NPs.

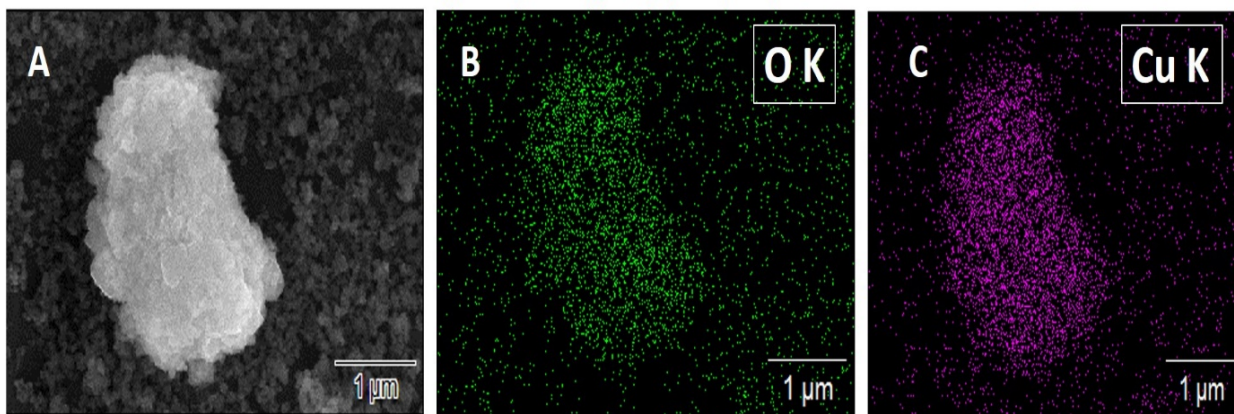

**SupplementaryFigure S3:** Distribution of Copper and oxygen in CuO NPs by elemental mapping (A-C)
